# Supplementary material
Source: publisher figshare collection journal article supplement (https://acs.figshare.com/ndownloader/files/3889441)

## Supporting Information

For

# Transition Metal-Free Direct C-H Functionalization of Quinones and Naphthoquinones with Diaryliodonium Salts: Synthesis of Aryl Naphthoquinones as $\beta$ -secretase Inhibitors

*Dawei Wang,<sup>\*,†</sup> Bingyang Ge,<sup>†</sup> Liang Li,<sup>†</sup> Jie Shan<sup>†</sup> and Yuqiang Ding<sup>\*,†</sup>*

*The Key Laboratory of Food Colloids and Biotechnology, Ministry of Education, School of  
Chemical and Material Engineering, Jiangnan University, 1800 Lihu Road, Wuxi, Jiangsu  
Province 214122, China.*

*E-mail: wangdw@jiangnan.edu.cn, yding@jiangnan.edu.cn*

1. General methods and materials.-----S2-S2
2. Typical procedure for the preparation diaryliodonium salts -----S2-S2
3. Copies of NMR spectra.-----S3-S18

## 1. General methods and materials

1,4-quinone, 1,4-naphthoquinone and other chemicals were obtained from commercial resource and used without further purification. All solvents were dried and purified by known procedures and freshly distilled under nitrogen from appropriate drying agents prior to use. The products were isolated by column chromatography on silica gel (200-300 mesh or 100-200 mesh) by using petroleum ether (60-90 °C) and ethyl acetate as the eluant. All yields described herein are the isolated yields after column chromatography. Reaction progress and product mixtures were routinely monitored by TLC using TLC SiO<sub>2</sub> sheets, and compounds were visualized under ultraviolet light. <sup>1</sup>H-NMR spectra were recorded using CDCl<sub>3</sub> as a solvent. <sup>1</sup>H-NMR chemical shifts are referenced to tetramethylsilane (TMS) (0 ppm). All products reported showed <sup>1</sup>H-NMR and <sup>13</sup>C-NMR spectra in agreement with the assigned structures.

**diaryliodonium salts** was synthesized according to the literature as below:

(1) Bielawski, M.; Olofsson, B. *Chem. Commun.* **2007**, 2521-2523. (2) Bielawski, M.; Zhu, M.; Olofsson, B. *Adv. Synth. Catal.* **2007**, 349, 2610-2618.

## 2. Typical procedure for the preparation diaryliodonium salts.

A mixture of aryl iodide (2.0 mmol), *m*-Chloroperbenzoic acid (2.2 mmol) was dissolved in DCM (10 mL) in a flask. The arene (2.0 mmol) was added at room temperature, and the mixture was added TfOH (4.0 mmol) dropwise at water bath under room temperature. The mixture was stirred at room temperature for overnight. Then the mixture of reaction was evaporated to give the residue, which cold diethyl ether (10 mL) was added and the mixture was stirred at rt for 20 min to precipitate out an white solid. The flask was stored in the freezer for 1 h, then the solid was filtered off, washed with cold diethyl ether and dried under vacuum to give diaryliodonium salt.

### 3. Copies of NMR spectra.

<sup>1</sup>H-NMR spectrum of 3a

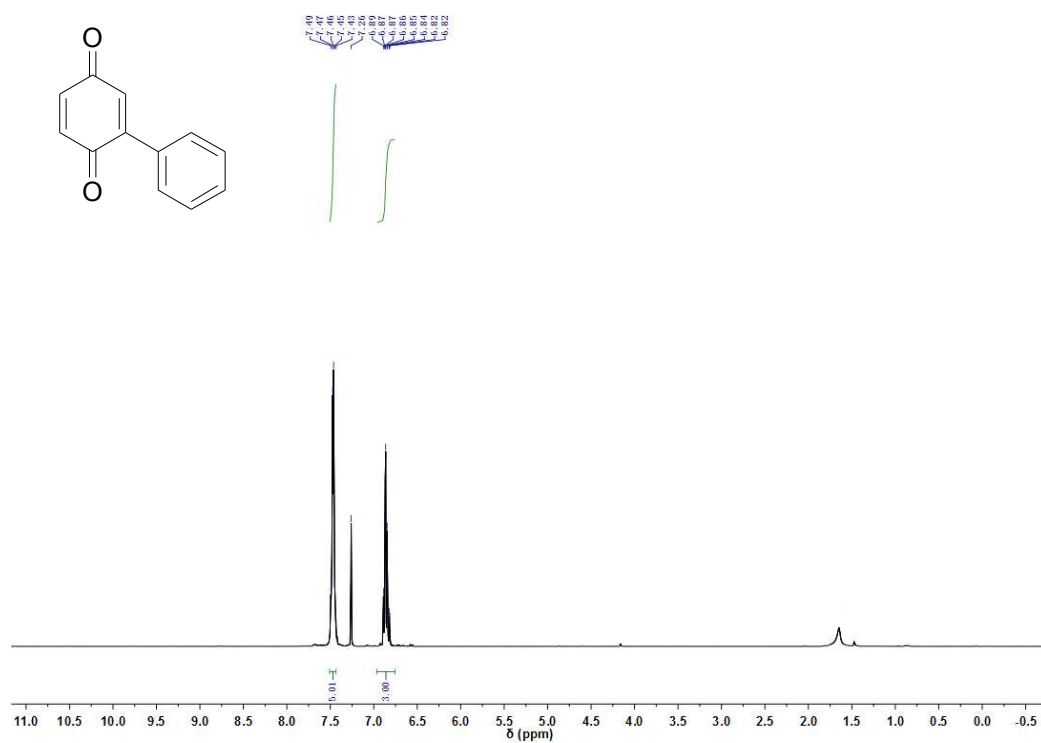

<sup>1</sup>H-NMR spectrum of 3b

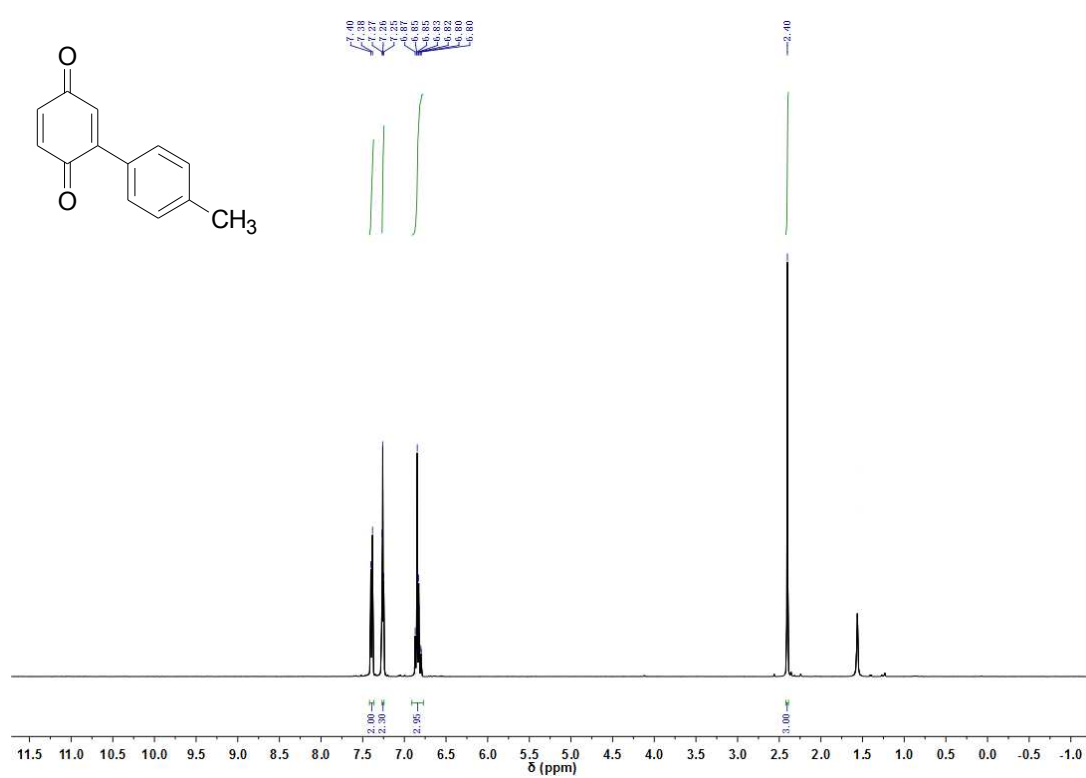

**<sup>1</sup>H-NMR spectrum of 3c**

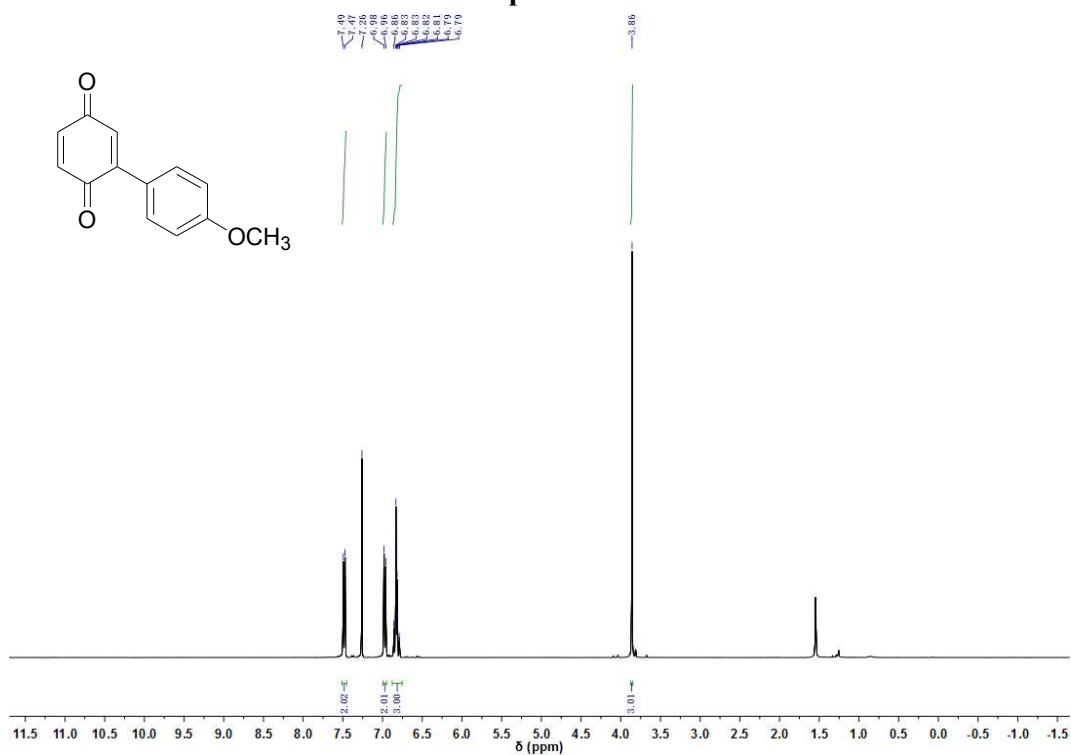

**<sup>1</sup>H-NMR spectrum of 3d**

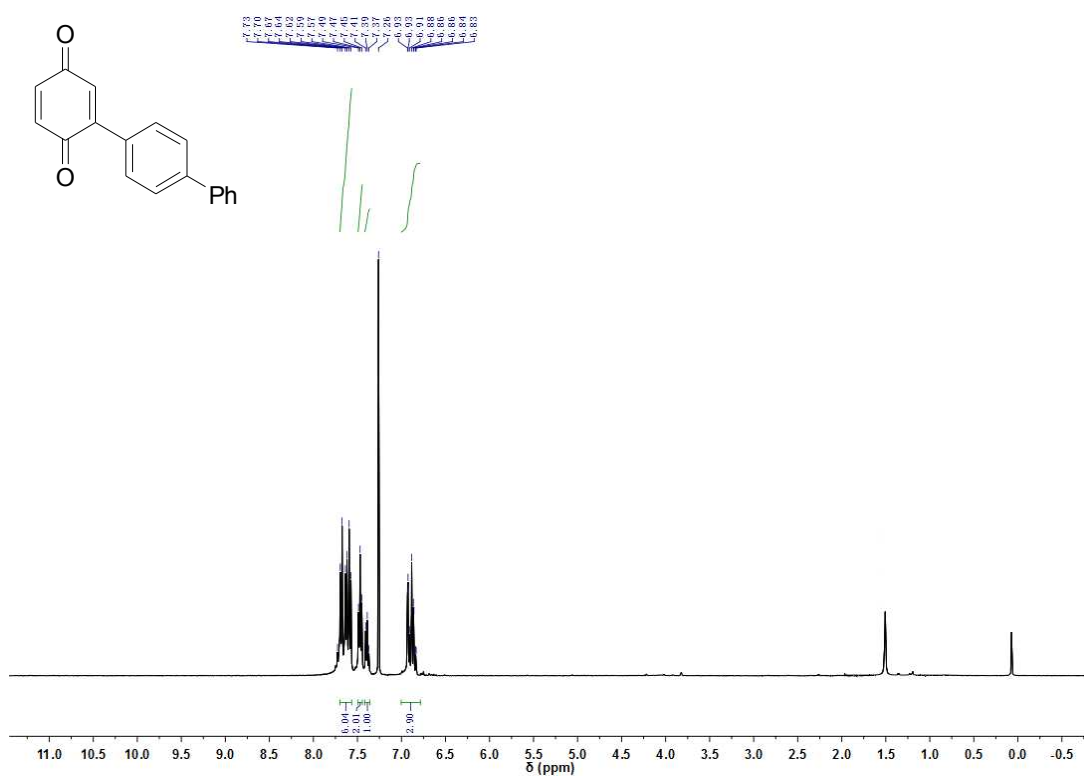

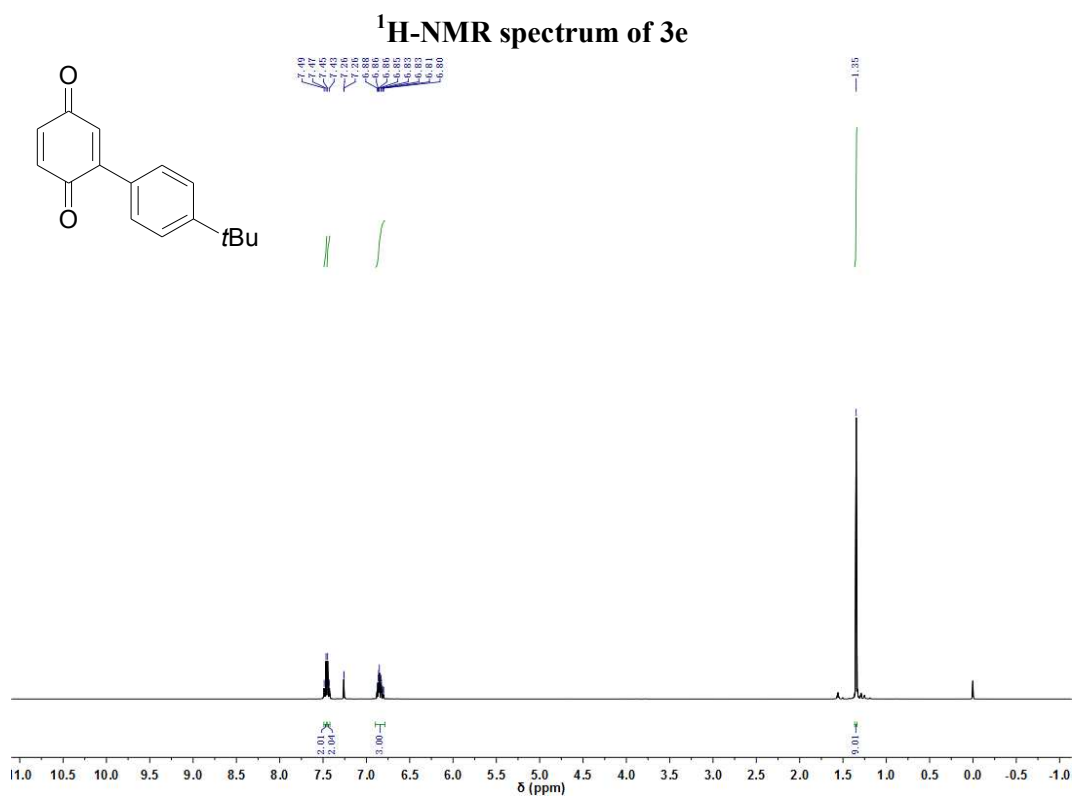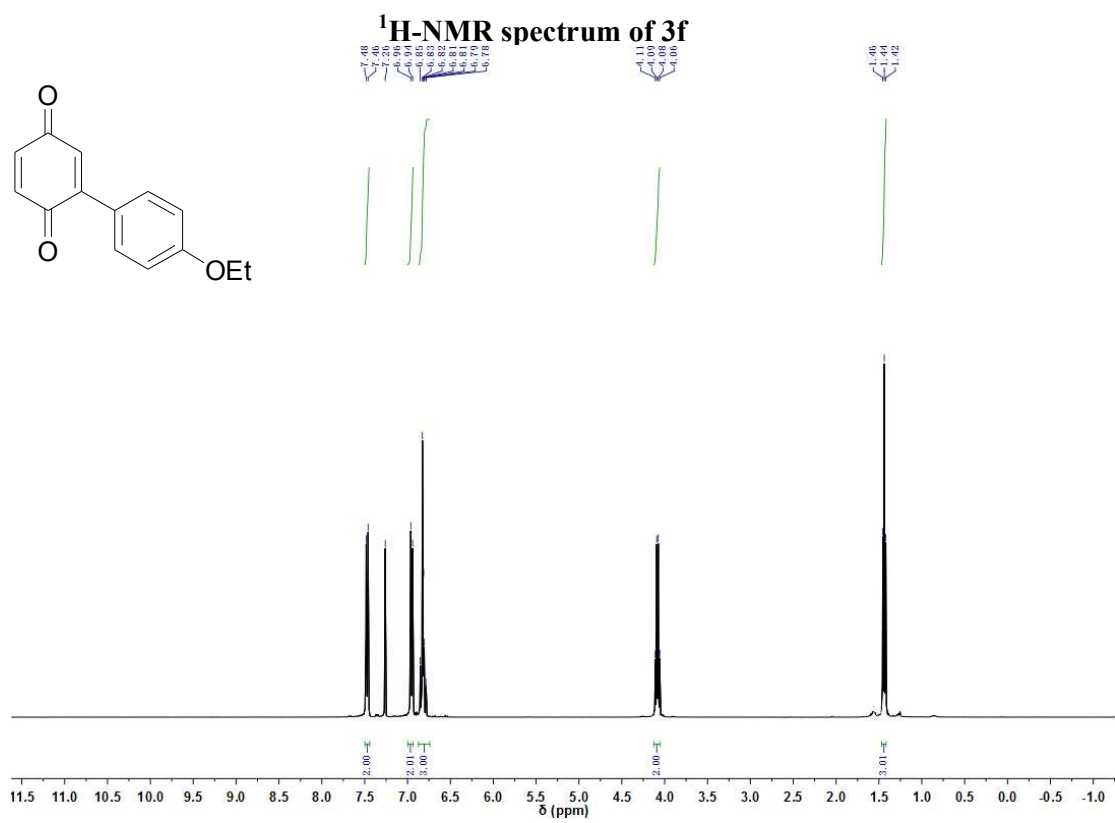

**<sup>1</sup>H-NMR spectrum of 3g**

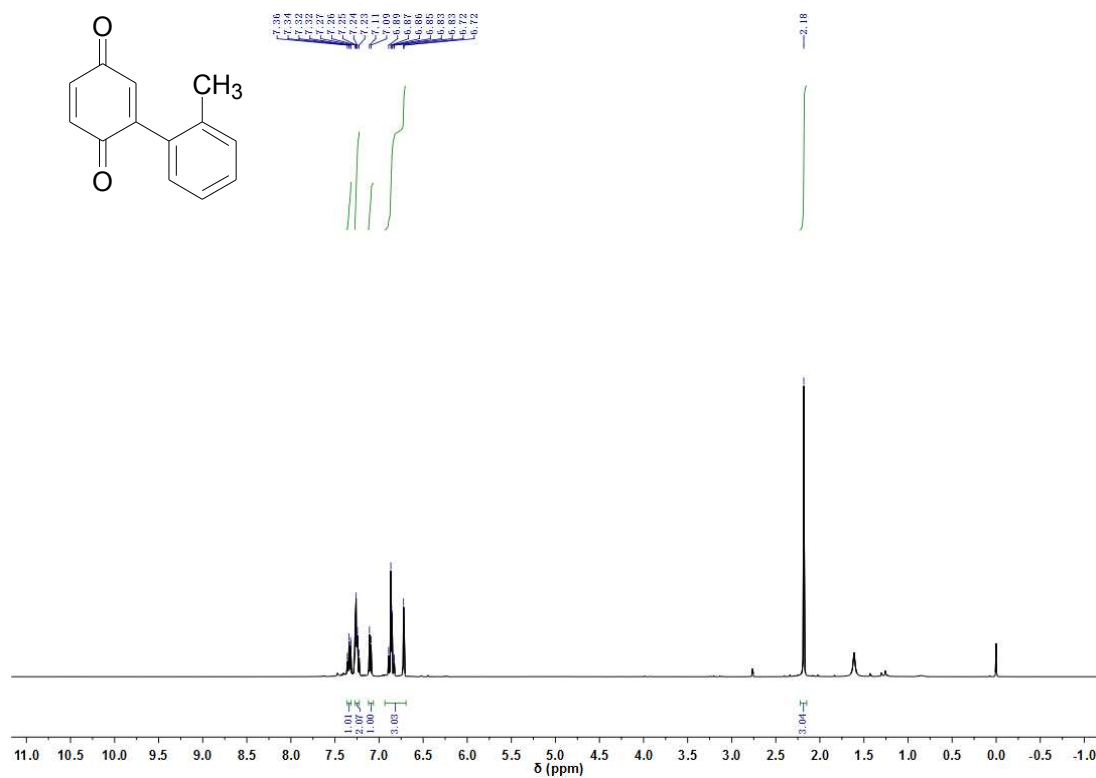

**<sup>1</sup>H-NMR spectrum of 3h**

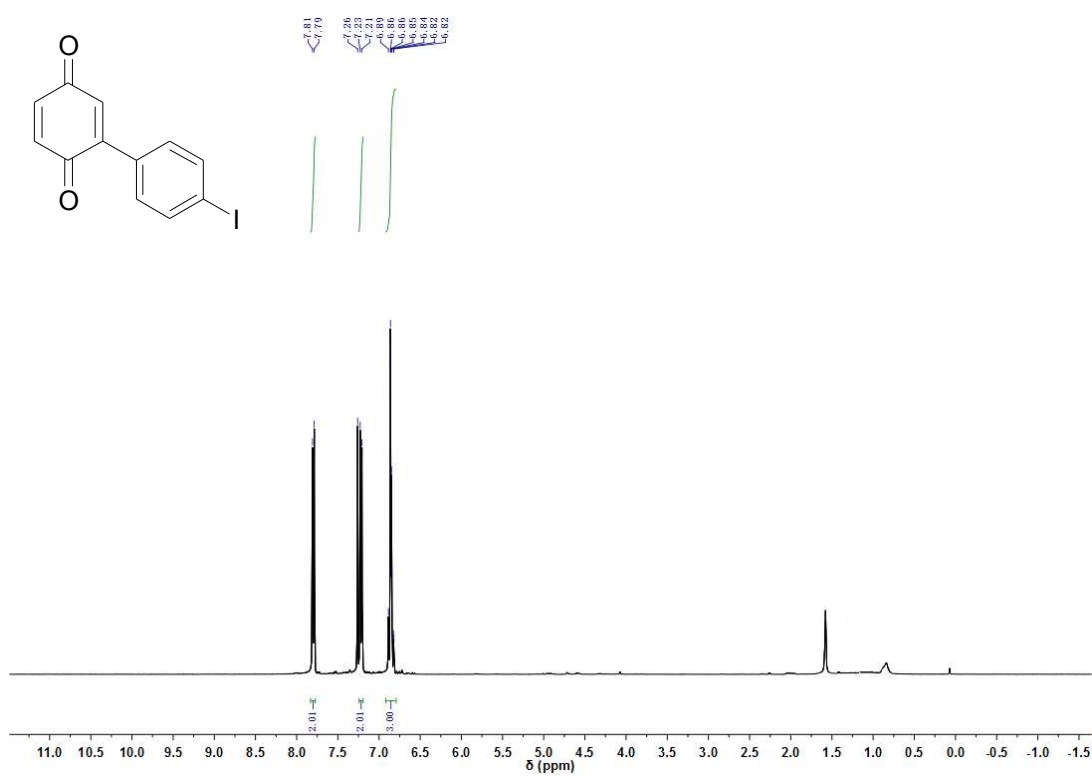

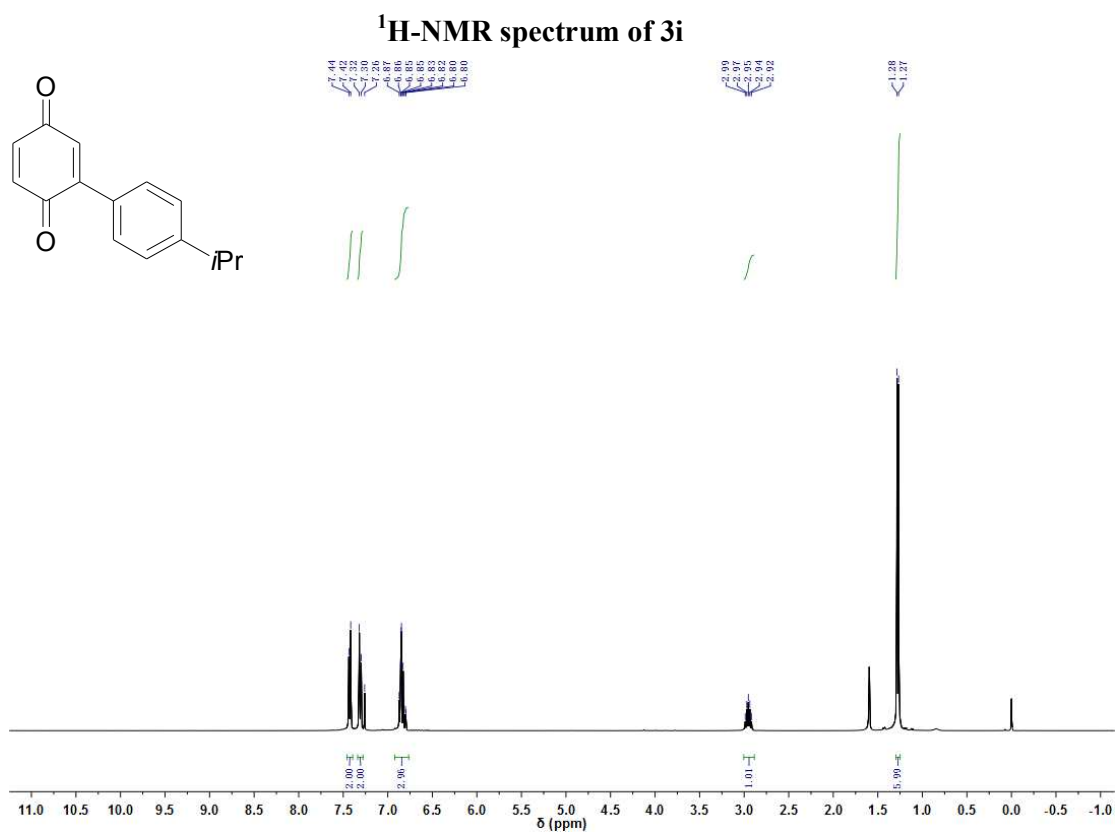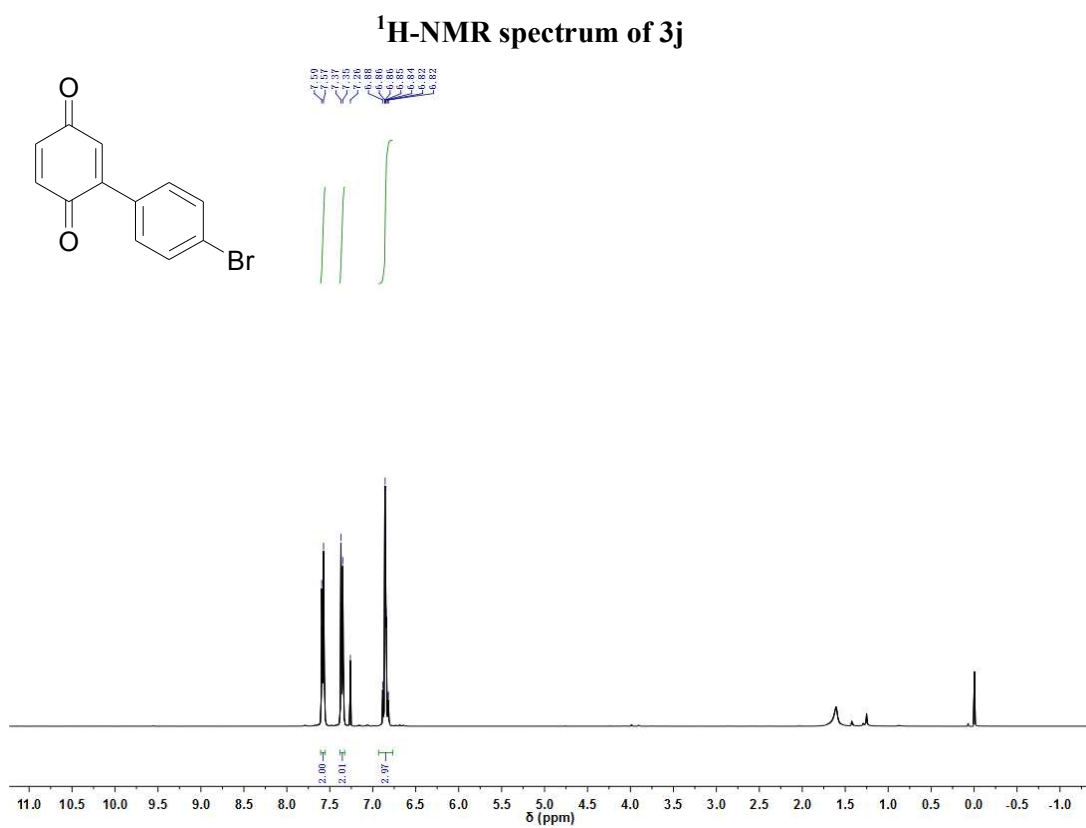





**<sup>1</sup>H-NMR spectrum of 3m**

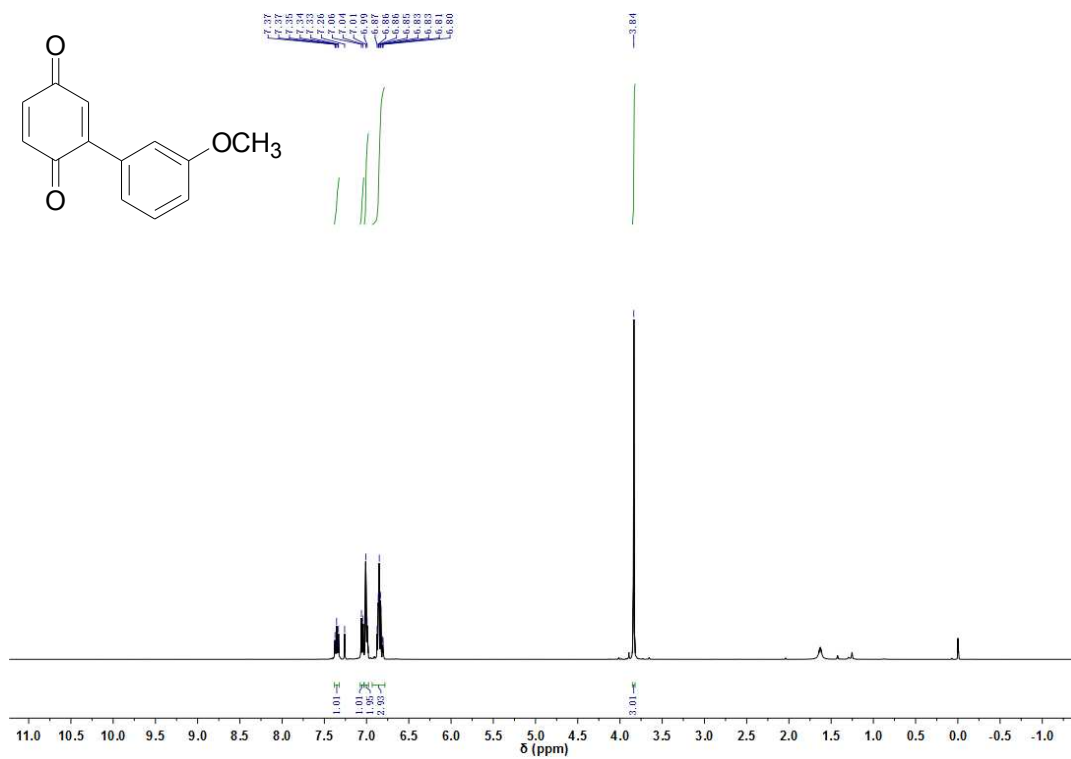

**<sup>1</sup>H-NMR spectrum of 3n**

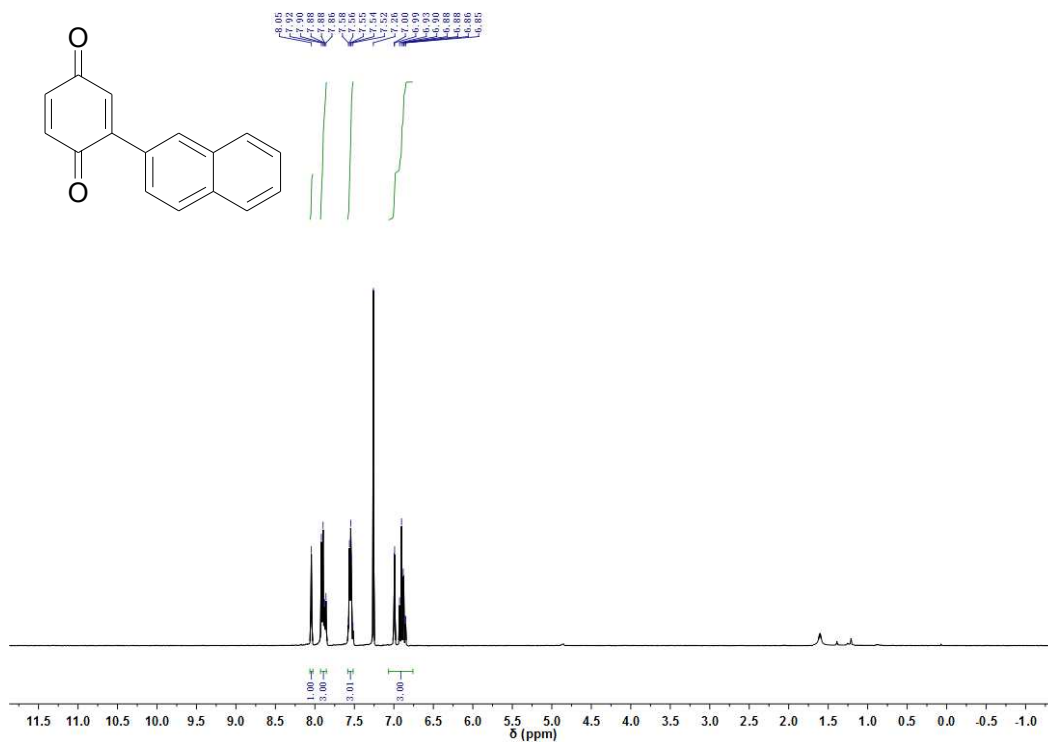

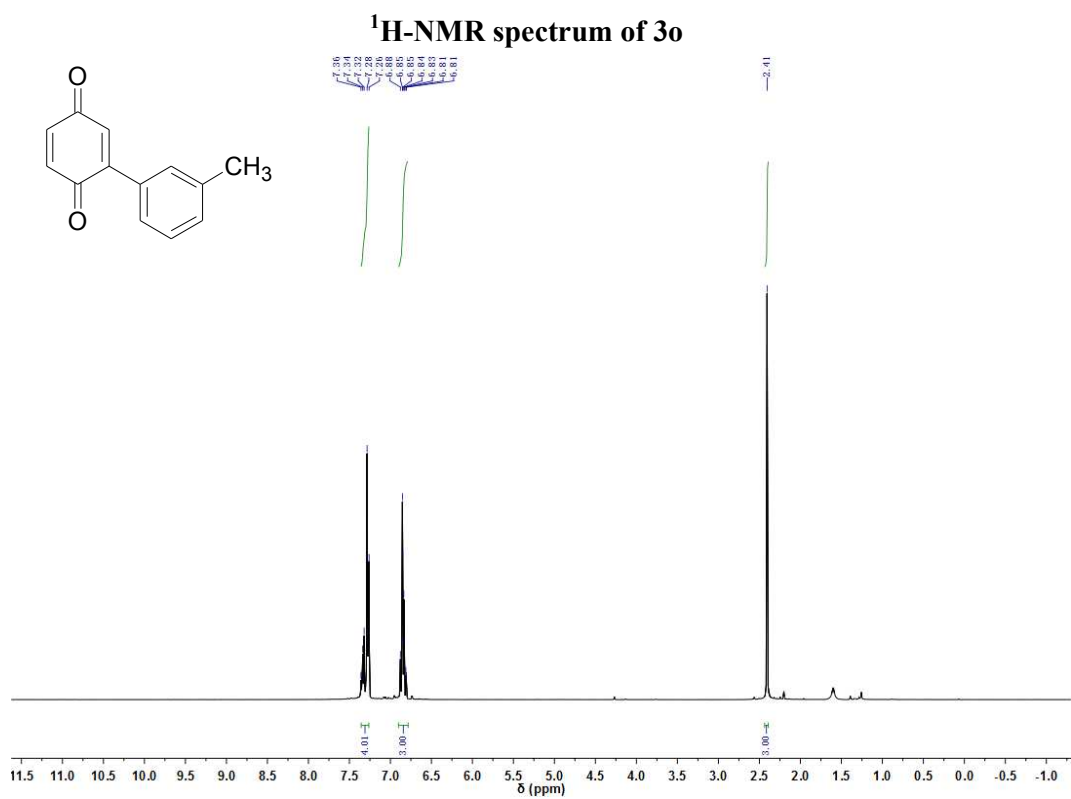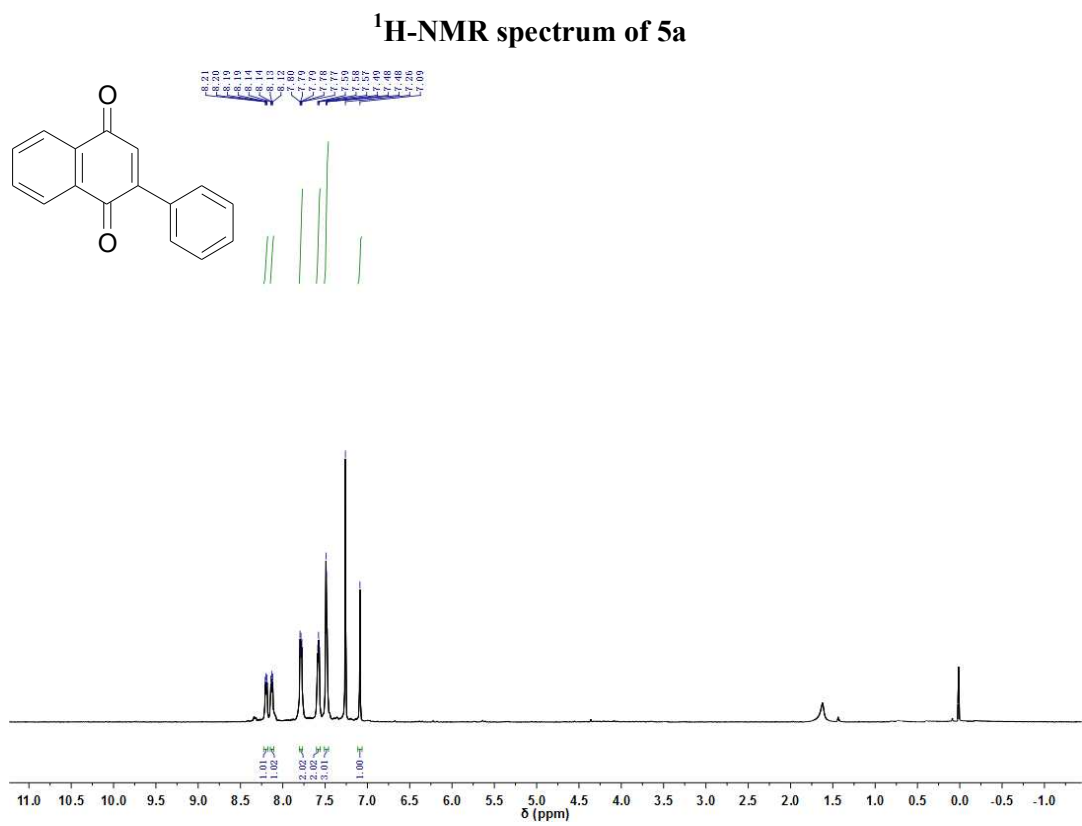

**<sup>1</sup>H-NMR spectrum of 5b**

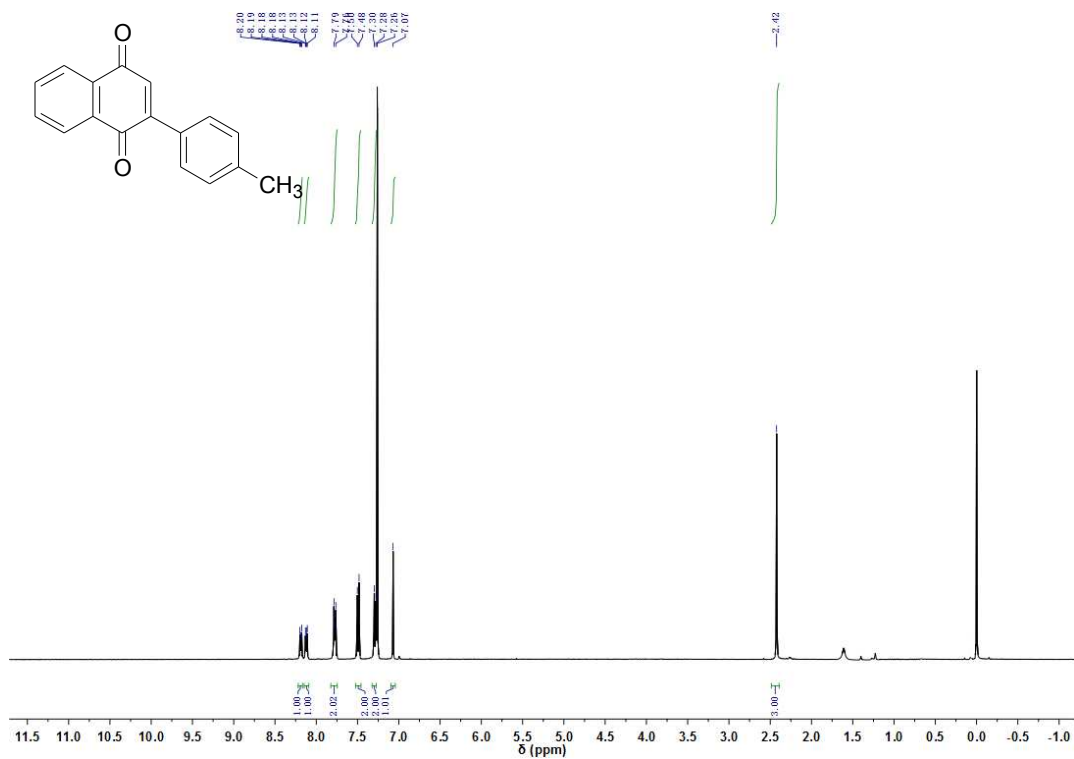

**<sup>1</sup>H-NMR spectrum of 5c**

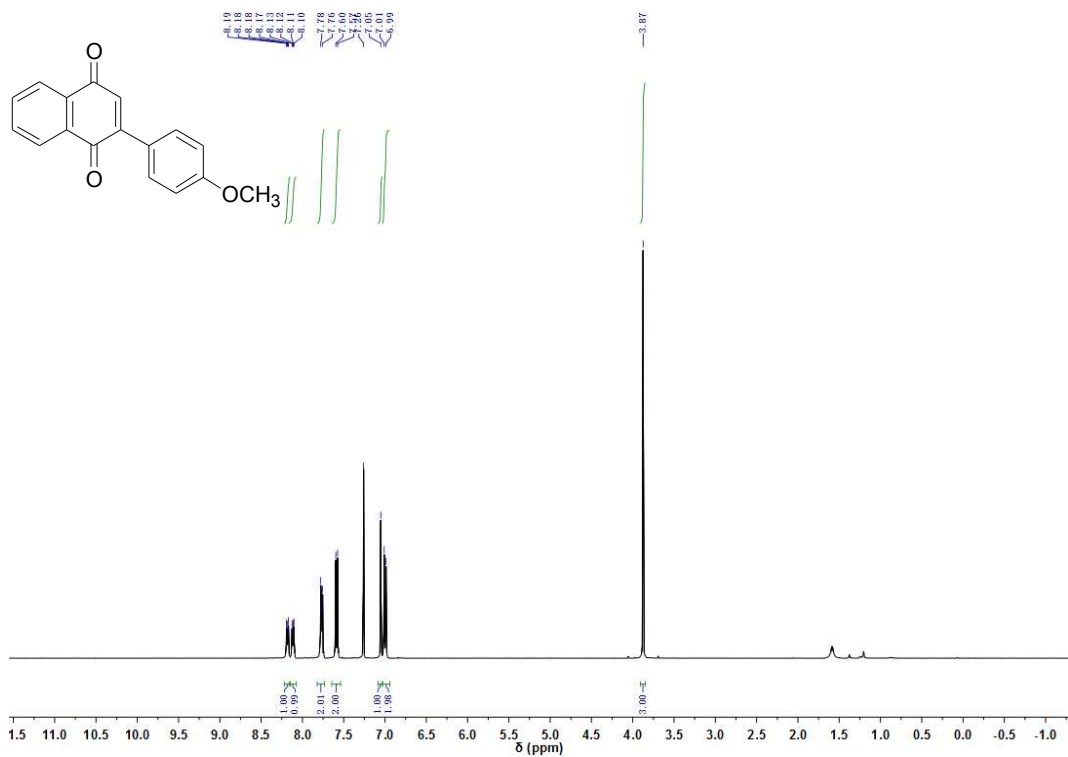

Cc1ccc(cc1)C2=C(C(=O)c3ccccc3C2=O)C(=O)c4ccccc4

Chemical structure: 2-(4-methylphenyl)-1,4-naphthoquinone.

<sup>1</sup>H NMR spectrum (CDCl<sub>3</sub>) showing peaks in the aromatic region (6.8-8.2 ppm) and a methyl singlet (2.23 ppm). Integration values are provided below the peaks.

| Chemical Shift (ppm)                           | Integration |
|------------------------------------------------|-------------|
| 8.17, 8.15, 8.13                               | 2.00        |
| 7.80, 7.38, 7.34, 7.30, 7.27, 7.26, 7.17, 6.94 | 2.01        |
| 2.23                                           | 3.00        |

**Chemical Structure:** 4-(4-tert-butylphenyl)-1,2-naphthoquinone

**<sup>1</sup>H NMR Data (CDCl<sub>3</sub>):**

| Chemical Shift (ppm) | Integration |
|----------------------|-------------|
| 8.10 (d, 2H)         | 1.00        |
| 7.90 (d, 2H)         | 1.00        |
| 7.60 (t, 2H)         | 2.01        |
| 7.40 (t, 2H)         | 4.01        |
| 7.20 (d, 2H)         | 0.98        |
| 1.37 (s, 9H)         | 9.01        |

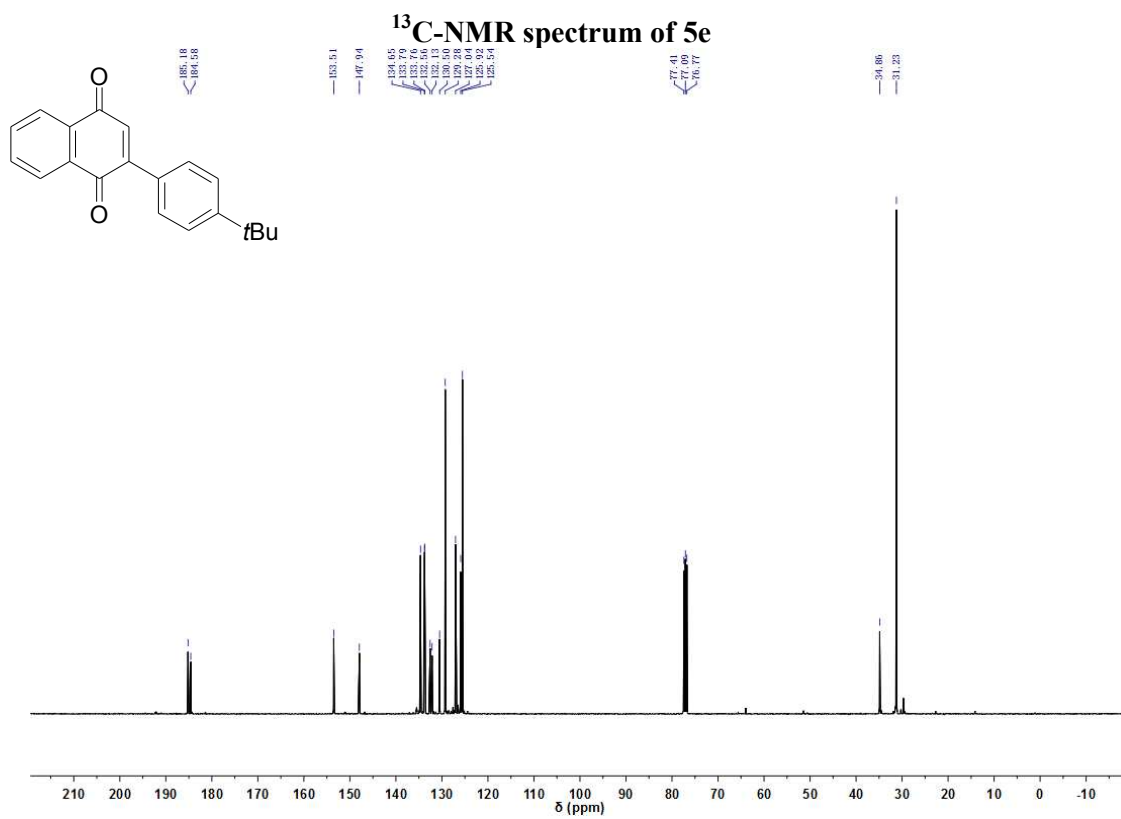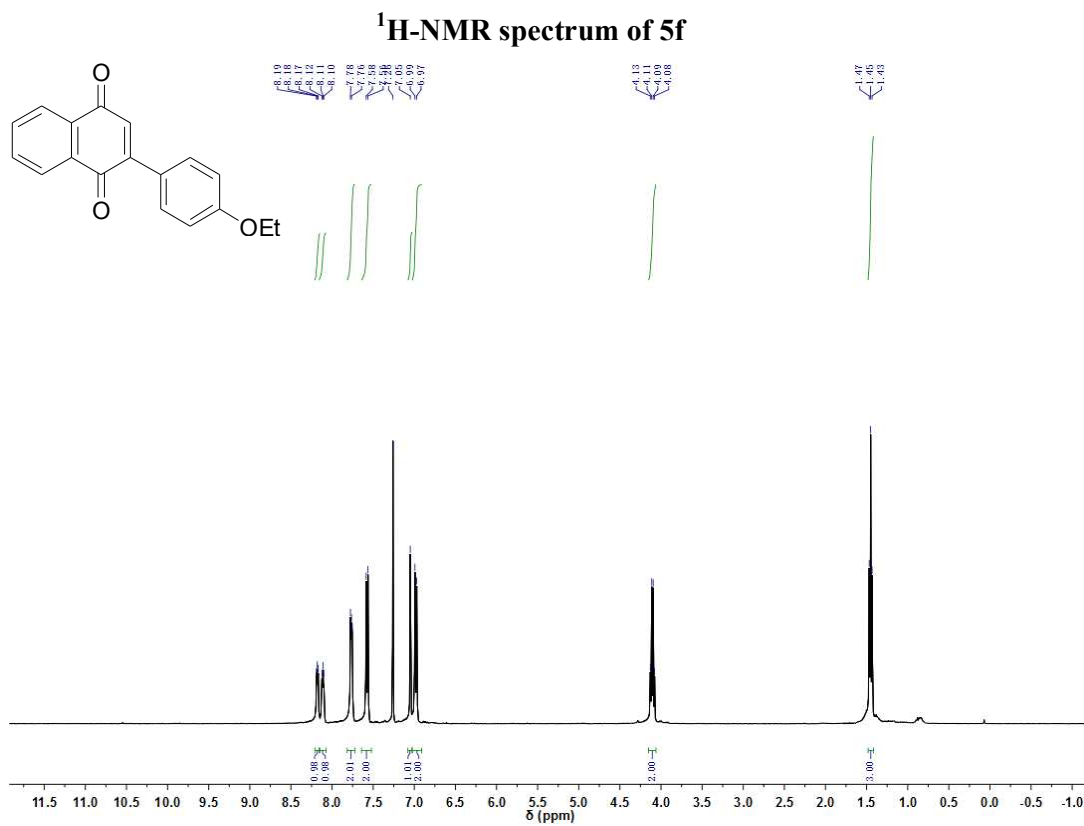

**$^{13}\text{C}$ -NMR spectrum of 5f**

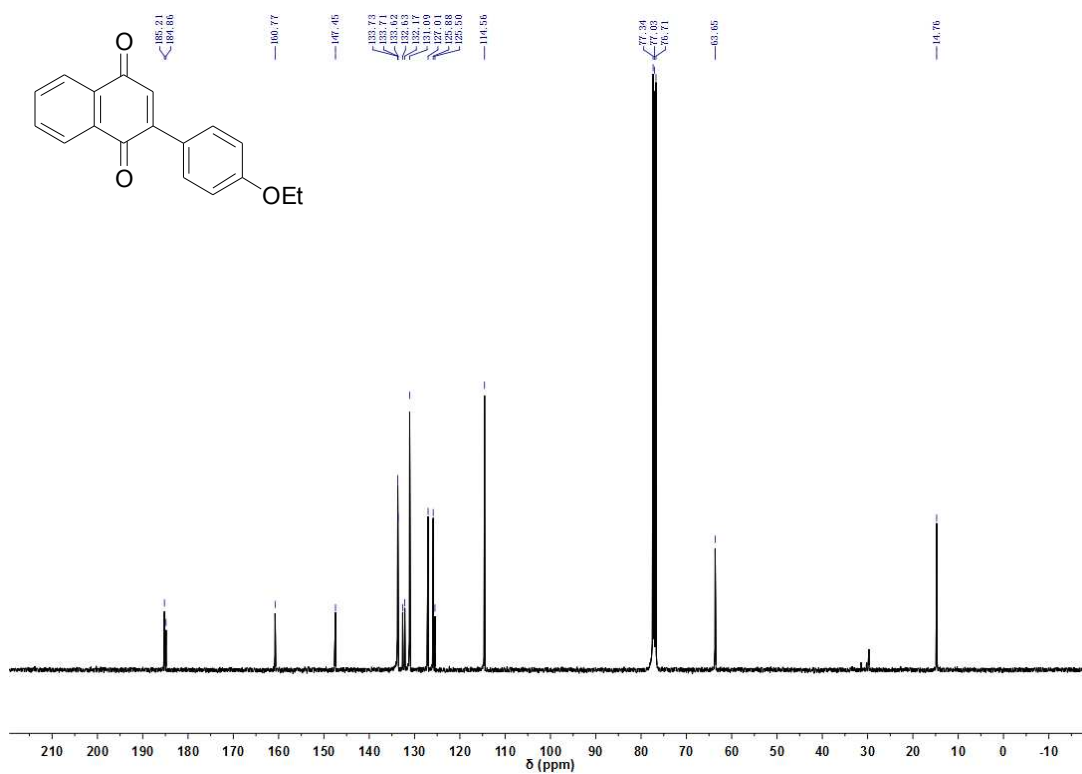

**$^1\text{H}$ -NMR spectrum of 5g**

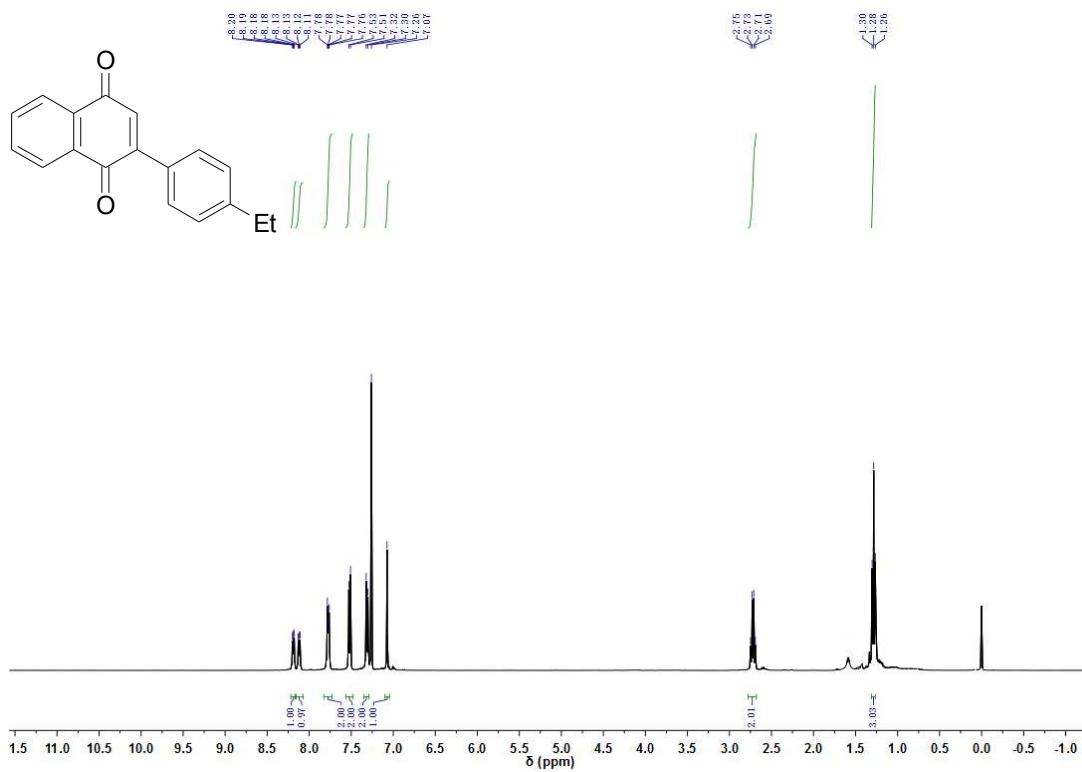

Cc1ccc(cc1)-c2c(=O)c3ccccc3c(=O)c2

Chemical structure of 4-(4-methylphenyl)-1,2-benzoquinone is shown. The  $^1\text{H}$  NMR spectrum (CDCl<sub>3</sub>) displays peaks in the aromatic region (6.8–8.2 ppm) and a methyl singlet (2.4 ppm). Integration values are provided below the peaks.

Chemical structure: 4-phenyl-1,4-benzoquinone

<sup>1</sup>H NMR spectrum (CDCl<sub>3</sub>) showing peaks in the aromatic region (7.1-8.3 ppm) and a reference peak at 0 ppm. Integration values are provided below the peaks.

| Chemical Shift (ppm)                                                         | Integration            |
|------------------------------------------------------------------------------|------------------------|
| 8.22, 8.20, 8.15, 8.14                                                       | 1.00                   |
| 7.80, 7.79, 7.78, 7.72, 7.70, 7.69, 7.64, 7.50, 7.46, 7.41, 7.39, 7.35, 7.26 | 2.01, 2.01, 1.00, 1.00 |
| 0.00                                                                         | 1.00                   |

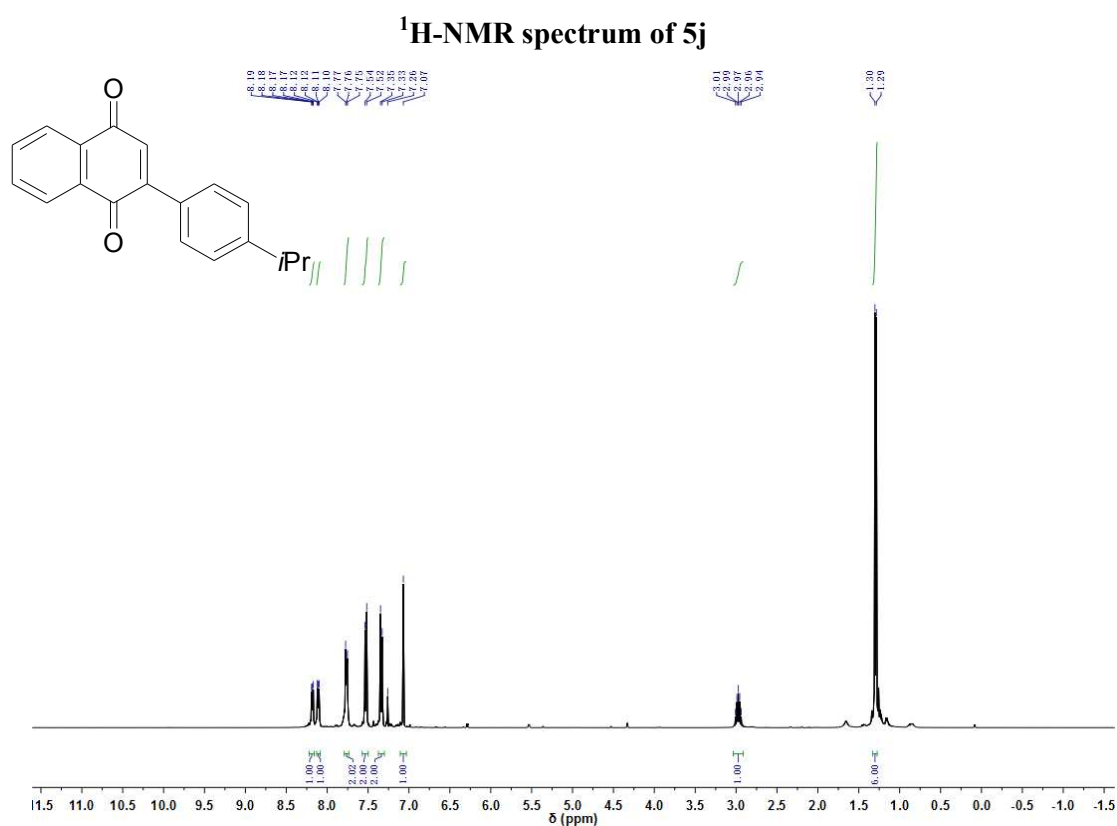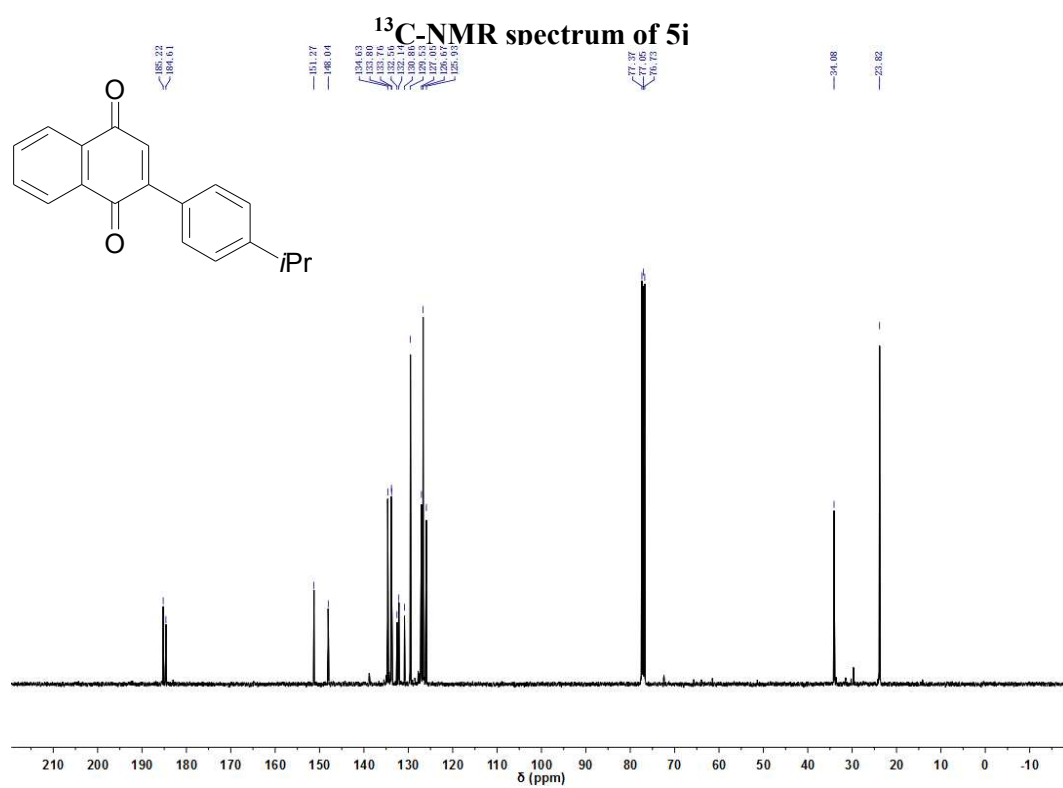



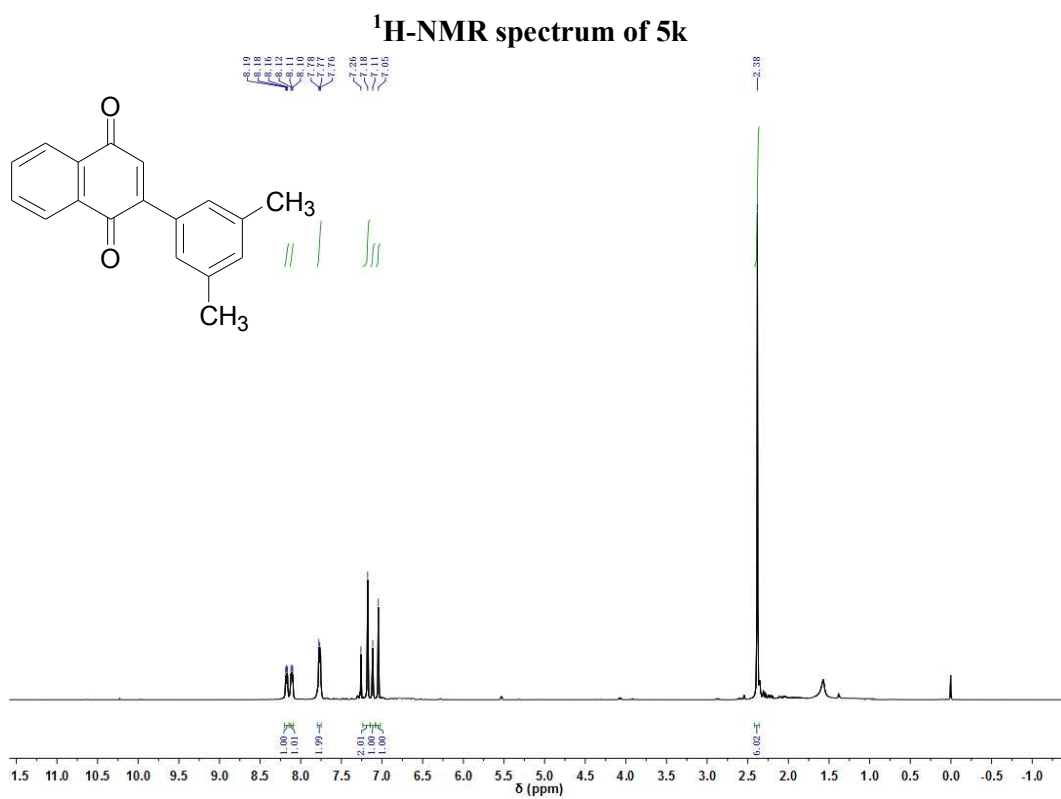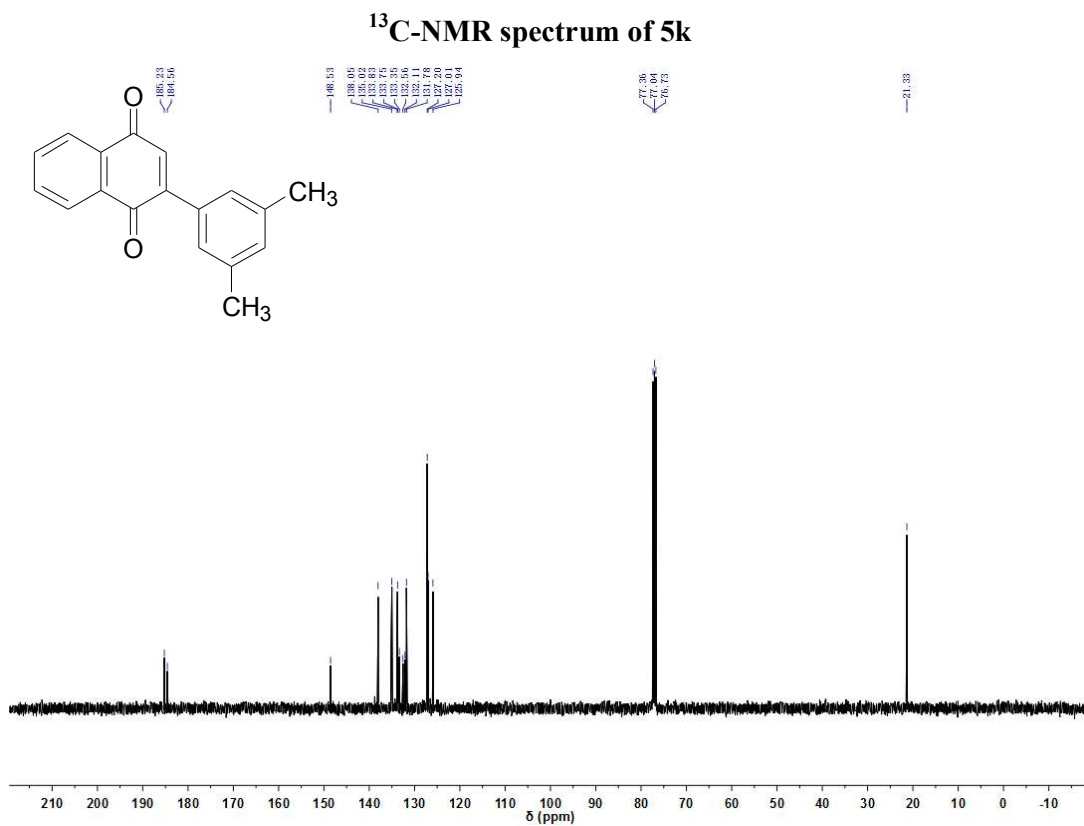

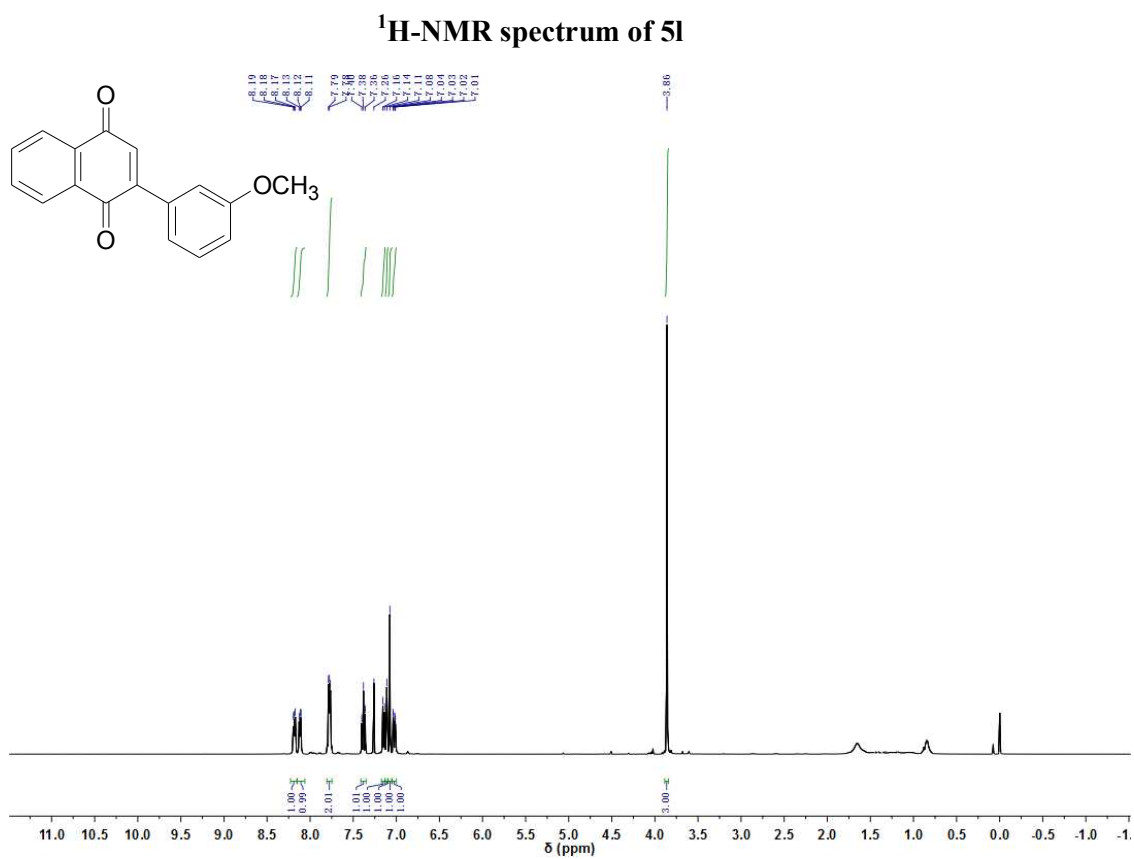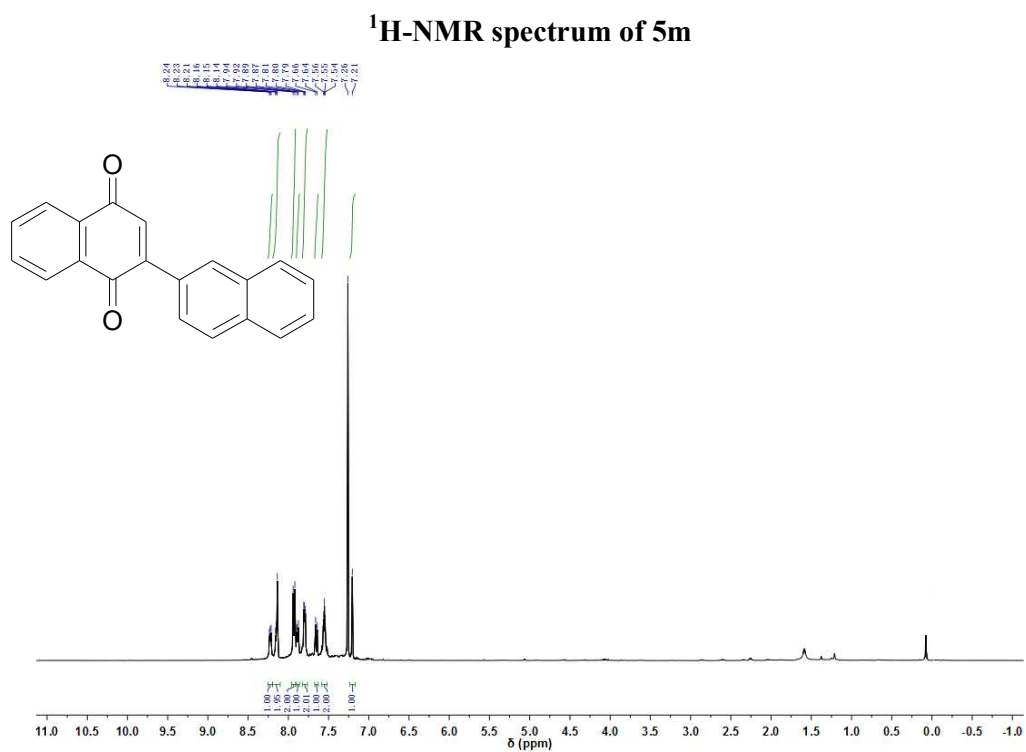

Supplement: Supplementary file 1 [file 3889441]
